# Supplementary material
Source: publisher figshare collection journal article supplement (https://gsajournals.figshare.com/articles/dataset/_/12899681)
Supplement: Supplementary file 1 [file 1]

| Strain1 | Strain2 | FisherExactP | FDR-adjusted-p |
|---------|---------|--------------|----------------|
| PWK     | 129S1   | 0.7764       | 0.8296         |
| PWK     | FVB     | 0.1354       | 0.2515         |
| PWK     | BALB    | 0.007827     | 0.0226         |
| PWK     | NOD     | 0.003394     | 0.0110         |
| PWK     | C3H     | 0.0007257    | 0.0029         |
| PWK     | DBA     | 0.02394      | 0.0584         |
| PWK     | NZO     | 0.0007466    | 0.0029         |
| PWK     | C57L    | 1.12E-06     | 7.94E-06       |
| PWK     | C57BLKS | 4.24E-08     | 6.61E-07       |
| PWK     | C58     | 4.71E-09     | 1.14E-07       |
| PWK     | AJ      | 3.12E-09     | 1.14E-07       |
| PWK     | BTBR    | 3.14E-07     | 3.32E-06       |
| 129S1   | FVB     | 0.2022       | 0.3584         |
| 129S1   | BALB    | 0.01639      | 0.0412         |
| 129S1   | NOD     | 0.005928     | 0.0178         |
| 129S1   | C3H     | 0.001363     | 0.0048         |
| 129S1   | DBA     | 0.04187      | 0.0961         |
| 129S1   | NZO     | 0.001215     | 0.0045         |
| 129S1   | C57L    | 1.72E-06     | 1.12E-05       |
| 129S1   | C57BLKS | 5.68E-08     | 7.38E-07       |
| 129S1   | C58     | 5.87E-09     | 1.14E-07       |
| 129S1   | AJ      | 3.84E-09     | 1.14E-07       |
| 129S1   | BTBR    | 6.63E-07     | 5.17E-06       |
| FVB     | BALB    | 0.7696       | 0.8296         |
| FVB     | NOD     | 0.3365       | 0.5102         |
| FVB     | C3H     | 0.0892       | 0.1739         |
| FVB     | DBA     | 0.2797       | 0.4452         |
| FVB     | NZO     | 0.05442      | 0.1147         |
| FVB     | C57L    | 0.004633     | 0.0145         |
| FVB     | C57BLKS | 0.001909     | 0.0065         |
| FVB     | C58     | 0.0005045    | 0.0023         |
| FVB     | AJ      | 0.0003496    | 0.0017         |
| FVB     | BTBR    | 0.0006019    | 0.0026         |
| BALB    | NOD     | 0.2531       | 0.4200         |
| BALB    | C3H     | 0.04588      | 0.1022         |
| BALB    | DBA     | 0.3467       | 0.5102         |
| BALB    | NZO     | 0.04718      | 0.1022         |
| BALB    | C57L    | 0.0001376    | 7.16E-04       |
| BALB    | C57BLKS | 6.60E-06     | 3.96E-05       |
| BALB    | C58     | 4.08E-07     | 3.54E-06       |

|         |         |          |          |
|---------|---------|----------|----------|
| BALB    | AJ      | 3.40E-07 | 3.32E-06 |
| BALB    | BTBR    | 6.59E-05 | 3.67E-04 |
| NOD     | C3H     | 0.5264   | 0.6562   |
| NOD     | DBA     | 0.7686   | 0.8296   |
| NOD     | NZO     | 0.3163   | 0.4934   |
| NOD     | C57L    | 0.06793  | 0.1394   |
| NOD     | C57BLKS | 0.02907  | 0.0687   |
| NOD     | C58     | 0.01301  | 0.0350   |
| NOD     | AJ      | 0.009808 | 0.0273   |
| NOD     | BTBR    | 0.01453  | 0.0378   |
| C3H     | DBA     | 1        | 1.0000   |
| C3H     | NZO     | 0.7694   | 0.8296   |
| C3H     | C57L    | 0.4711   | 0.6228   |
| C3H     | C57BLKS | 0.3434   | 0.5102   |
| C3H     | C58     | 0.2184   | 0.3734   |
| C3H     | AJ      | 0.1239   | 0.2357   |
| C3H     | BTBR    | 0.08217  | 0.1643   |
| DBA     | NZO     | 0.6968   | 0.8112   |
| DBA     | C57L    | 0.4671   | 0.6228   |
| DBA     | C57BLKS | 0.4421   | 0.6050   |
| DBA     | C58     | 0.4062   | 0.5867   |
| DBA     | AJ      | 0.2202   | 0.3734   |
| DBA     | BTBR    | 0.1606   | 0.2913   |
| NZO     | C57L    | 1        | 1.0000   |
| NZO     | C57BLKS | 0.7653   | 0.8296   |
| NZO     | C58     | 0.5384   | 0.6562   |
| NZO     | AJ      | 0.5027   | 0.6428   |
| NZO     | BTBR    | 0.4277   | 0.5957   |
| C57L    | C57BLKS | 1        | 1.0000   |
| C57L    | C58     | 0.6717   | 0.7938   |
| C57L    | AJ      | 0.5017   | 0.6428   |
| C57L    | BTBR    | 0.2732   | 0.4440   |
| C57BLKS | C58     | 0.8442   | 0.8780   |
| C57BLKS | AJ      | 0.537    | 0.6562   |
| C57BLKS | BTBR    | 0.4155   | 0.5893   |
| C58     | AJ      | 0.8329   | 0.8779   |
| C58     | BTBR    | 0.5728   | 0.6874   |
| AJ      | BTBR    | 0.7618   | 0.8296   |
